# Supplementary material
Source: PubMed Central journal article supplement (PMC7132268)
Supplement: pnas.1908828117.sapp.pdf [file pnas.1908828117.sapp.pdf]

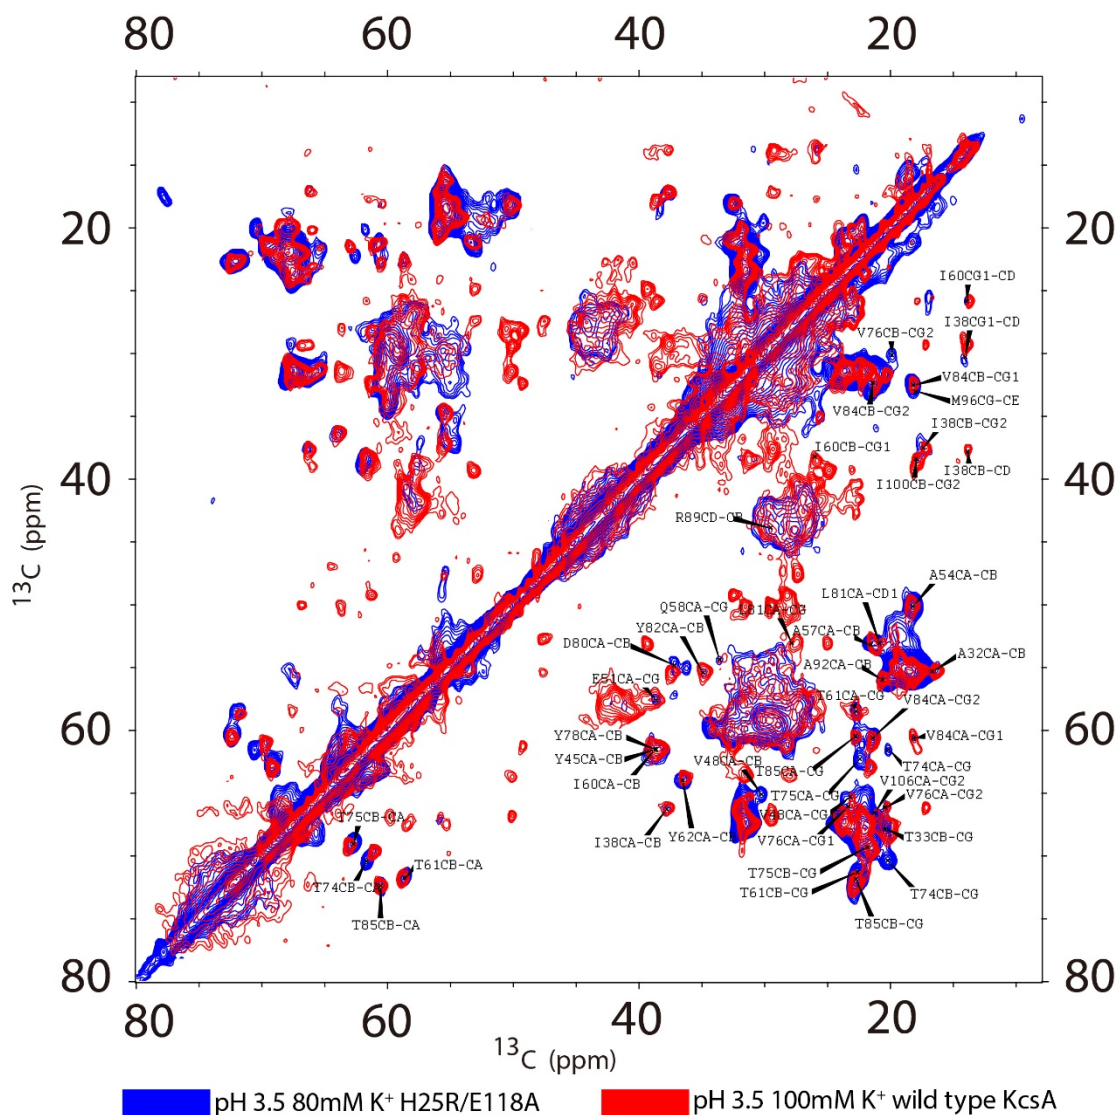

Fig. S2. 2D homonuclear  $^{13}\text{C}$  spectra of H25R/E118A at pH 3.5 and 80mM  $\text{K}^+$  and of wild type KcsA at pH 3.5 and 100 mM  $\text{K}^+$  are overlaid. The majority of the peaks of the mutant at low pH are identical to those of the wild type at the same pH (with the notable exception of the marker peaks in the selectivity filter since the mutant in this case is a mixed state). This indicates that the mutant is robust with respect to pH as is the wild type. Also, the data suggests that the mutant has a somewhat weaker potassium binding affinity at pH 3.5 than at 7.5 (at this  $[\text{K}^+]$  concentration the mutant is 50% bound at pH 7.5, but the apo state is more favorable at pH 3.5).

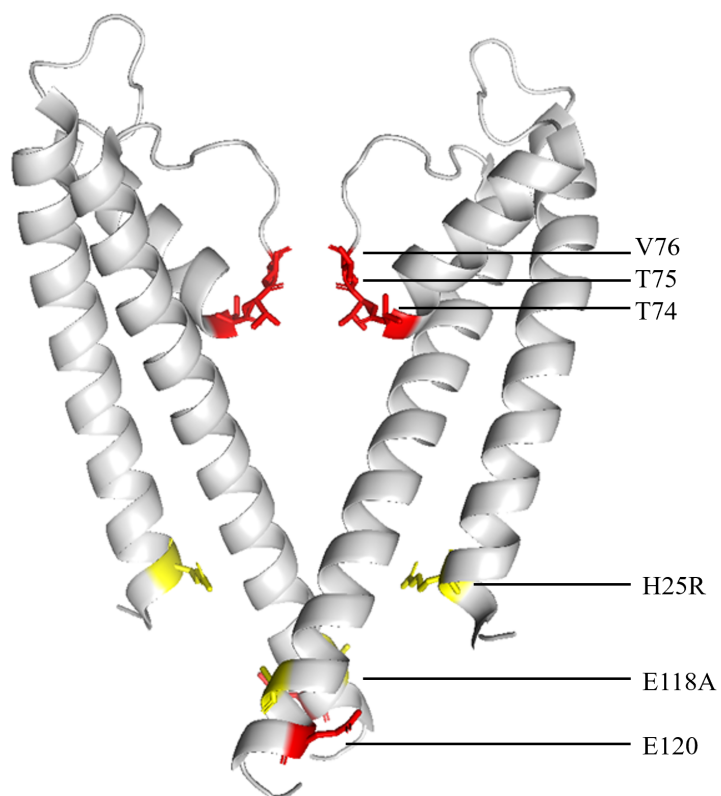

Fig. S3. Residues participating in the allosteric coupling are shown on a KcsA construct (PDB: 1k4C). Mutant residues, H25R and E118A, are colored yellow. Chemical shift markers used in this study are color red, T74, T75, V76, E120.

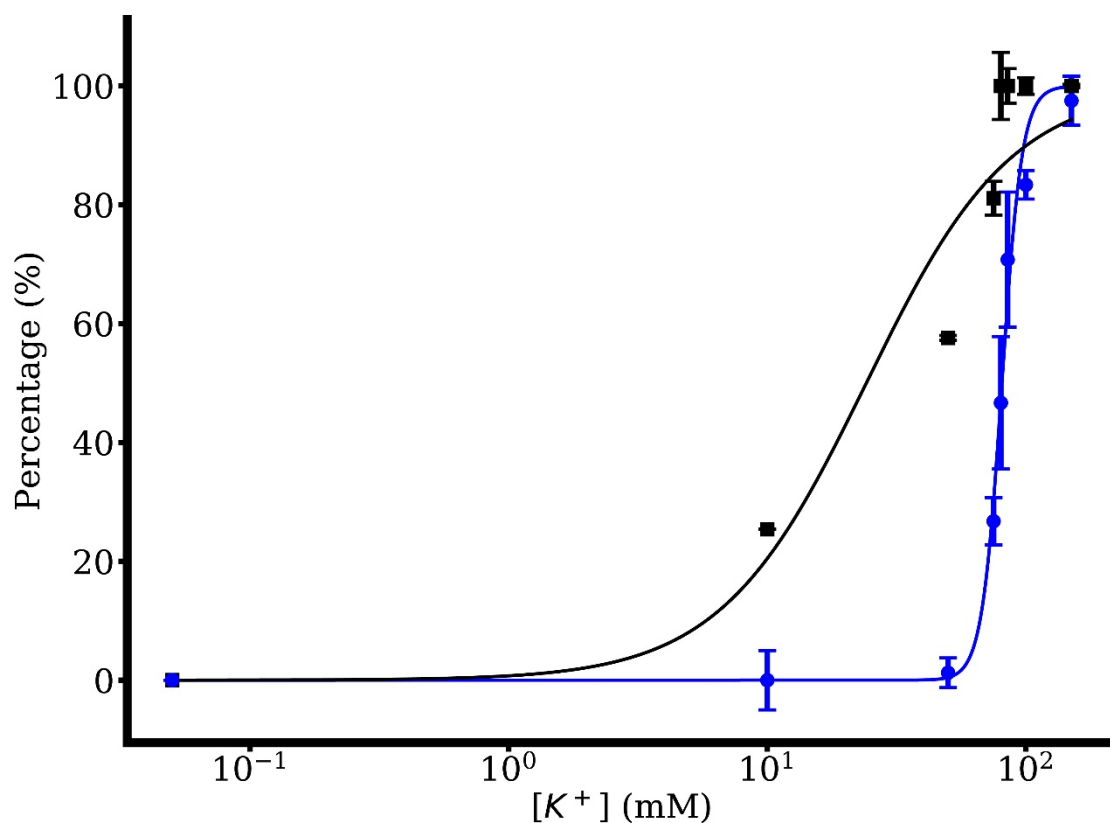

Fig. S4. The protonation state of E120 is monitored (percentage deprotonated state, black squares) in the same titration experiment where we probed binding at the selectivity filter (the percentage of the selectivity filter in the bound state, blue dots), both as a function of  $[K^+]$ . The populations were assessed based on peak intensities as described in the materials and methods. The black curve is the fit of the E120 data to the Hill equation with  $K_{app} = 24 \pm 7$  mM (R-Square = 0.91) and a Hill coefficient of  $n = 1.5$ . The titration behavior indicates that there is allosteric coupling between the intracellular and extracellular gates even in this constitutively open mutant. Compared to the selectivity filter, the pH sensor titrates at a slightly lower concentration, suggesting the presence of a distinct potassium binding sites.

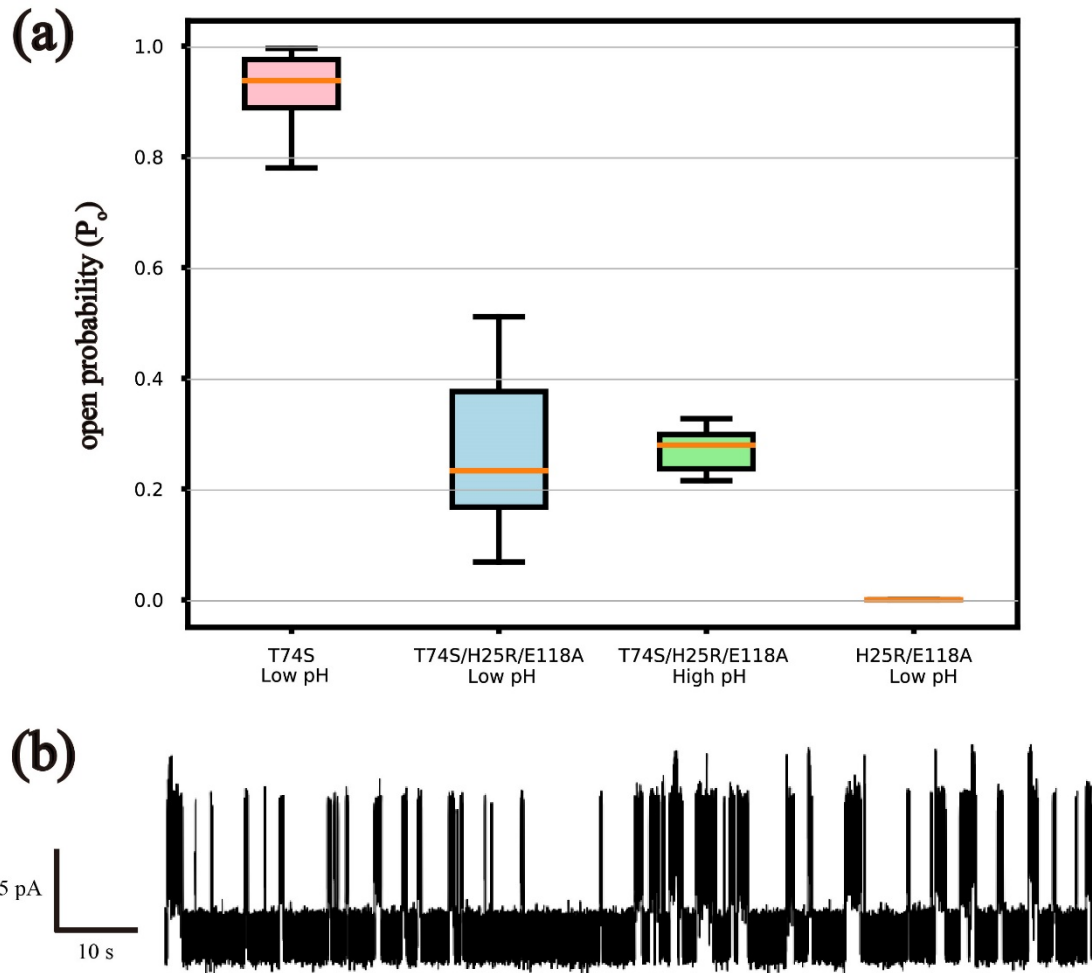

Fig. S5. Electrophysiology of the open pH gate mutant and T74S triple mutant. (a). box plot of channel open probability. Open probability of T74S low pH, H25RE118A\_T74S low pH, H25RE118A\_T74S high pH and H25RE118A low pH are  $90 \pm 10\%$ ,  $30 \pm 20\%$ ,  $27 \pm 4\%$  and  $0 \pm 0\%$ . The upper chamber buffer pH of T74S and H25R/E118A is 7 and the lower chamber buffer pH of the two samples is 4. The pH of both T74S/H25R/E118A buffer in the upper chamber are 7, but the pH of bath buffer in the chamber are 4 and 7 corresponding to low and high pH. (b). A trace of single channel T74S/H25R/E118A at +100 mV. The channel is 30% open compared to the 0%  $P_o$  of inactivated H25R/E118A, which suggests that the allosteric coupling between the dual gates are attenuated by the T74S mutation.

| model           | Hill function                                      |            |                  |              |
|-----------------|----------------------------------------------------|------------|------------------|--------------|
| equation        | $y = Vmax \frac{x^n}{x^n + k_d^n}$ (Vmax set to 1) |            |                  |              |
|                 | k value (mM)                                       | k std (mM) | Hill coefficient | adj r-square |
| WT pH7.5        | 0.0046                                             | 0.0009     | 1                | 0.967        |
| WT pH3.5        | 15                                                 | 1          | 1                | 0.991        |
| H25RE118A pH7.5 | 100                                                | 60         | 1                | 0.533        |
| H25RE118A pH7.5 | 81                                                 | 1          | 11               | 0.986        |

Table. S1. Parameters involved in optimized simulations to the Hill equation.

| Chemical shift markers of H25R/E118A at high [K+] and neutral pH |       |       |       |       |       |        |       |
|------------------------------------------------------------------|-------|-------|-------|-------|-------|--------|-------|
|                                                                  | CA    | CB    | CG    | CG1   | CG2   | CD     | CO    |
| T74                                                              | 61.05 | 69.65 | 21.41 | -     | -     | -      | 176.3 |
| T75                                                              | 63.03 | 69.63 | 21.08 | -     | -     | -      | 172.4 |
| V76                                                              | 66.06 | 31.73 | -     | 23.04 | 20.31 | -      | -     |
| E120                                                             | 59.40 | 36.31 | 34.11 | -     | -     | 177.30 | -     |

Table. S2. Chemical shift markers of H25R/E118A at high [K+] and neutral pH

| Chemical shift markers of H25R/E118A at low [K+] and neutral pH |       |       |       |       |       |        |       |
|-----------------------------------------------------------------|-------|-------|-------|-------|-------|--------|-------|
|                                                                 | CA    | CB    | CG    | CG1   | CG2   | CD     | CO    |
| T74                                                             | 61.18 | 69.94 | 20.92 | -     | -     | -      | 177.2 |
| T75                                                             | 62.89 | 69.54 | 21.27 | -     | -     | -      | 172.4 |
| V76                                                             | 66.06 | 31.33 | -     | 23.11 | 20.27 | -      | -     |
| E120                                                            | 59.40 | 36.31 | 36.15 | -     | -     | 183.10 | -     |

Table. S3. Chemical shift markers of H25R/E118A at low [K+] and neutral pH

|     | CA    | CB    | CG/CG1 | CG2   | CD/CD1 | CE |
|-----|-------|-------|--------|-------|--------|----|
| A32 | 55.37 | 16.76 | -      | -     | -      | -  |
| T33 | 67.72 | 67.87 | 20.24  | -     | -      | -  |
| I38 | 66.31 | 37.58 | 29.57  | 17.34 | 14.10  | -  |
| Y45 | 61.45 | 39.24 | -      | -     | -      | -  |
| V48 | 65.38 | 31.31 | 23.01  | 21.62 | -      | -  |
| E51 | 57.56 | -     | 38.20  | -     | -      | -  |
| A54 | 50.02 | 18.23 | -      | -     | -      | -  |
| P55 | 62.77 | -     | 28.57  | -     | -      | -  |
| A57 | 53.09 | 21.36 | -      | -     | -      | -  |
| Q58 | 53.21 | 32.29 | -      | -     | -      | -  |

|     |       |       |       |       |       |       |
|-----|-------|-------|-------|-------|-------|-------|
| I60 | 61.26 | 38.46 | 25.88 | 18.13 | 13.70 | -     |
| T61 | 58.57 | 71.68 | 22.52 | -     | -     | -     |
| Y62 | 63.81 | 36.97 | -     | -     | -     | -     |
| T74 | 61.05 | 69.65 | 21.41 | -     | -     | -     |
| T75 | 63.03 | 69.63 | 21.08 | -     | -     | -     |
| V76 | 66.06 | 31.73 | 23.04 | 20.31 | -     | -     |
| Y78 | 61.51 | 38.78 | -     | -     | -     | -     |
| D80 | 55.25 | 37.13 | -     | -     | -     | -     |
| L81 | 53.28 | -     | 27.50 | -     | 20.98 | -     |
| Y82 | 55.28 | 35.39 | -     | -     | -     | -     |
| V84 | 60.42 | 32.31 | 18.22 | 21.31 | -     | -     |
| T85 | 60.56 | 72.30 | 22.76 | -     | -     | -     |
| A92 | 55.81 | 20.46 | -     | -     | -     | -     |
| M96 | 59.85 | -     | 32.79 | -     | -     | 18.25 |

Table. S4. Assignment table of H25R/E118A at high [K+] and neutral pH

|     | CA    | CB    | CG/CG1 | CG2   | CD/CD1 | CE    |
|-----|-------|-------|--------|-------|--------|-------|
| A32 | 55.36 | 16.74 | -      | -     | -      | -     |
| T33 | 67.72 | 67.87 | 20.29  | -     | -      | -     |
| I38 | 66.31 | 37.61 | 29.67  | 17.34 | 14.07  | -     |
| Y45 | 61.47 | 39.10 | -      | -     | -      | -     |
| V48 | 65.35 | 31.04 | 23.05  | 21.62 | -      | -     |
| E51 | 57.57 | -     | 38.31  | -     | -      | -     |
| A54 | 50.04 | 18.22 | -      | -     | -      | -     |
| P55 | 62.77 | -     | 28.57  | -     | -      | -     |
| A57 | 53.11 | 21.41 | -      | -     | -      | -     |
| Q58 | 53.51 | 32.29 | 33.59  | -     | -      | -     |
| I60 | 61.29 | 38.46 | 25.89  | 18.13 | 13.73  | -     |
| T61 | 58.57 | 71.61 | 22.58  | -     | -      | -     |
| Y62 | 63.85 | 36.86 | -      | -     | -      | -     |
| T74 | 61.18 | 69.94 | 20.92  | -     | -      | -     |
| T75 | 62.89 | 69.54 | 21.27  | -     | -      | -     |
| V76 | 66.06 | 31.33 | 23.11  | 20.27 | -      | -     |
| Y78 | 61.51 | 38.75 | -      | -     | -      | -     |
| D80 | 55.13 | 37.15 | -      | -     | -      | -     |
| L81 | 53.22 | -     | 27.58  | -     | 20.95  | -     |
| Y82 | 55.32 | 35.27 | -      | -     | -      | -     |
| V84 | 60.46 | 32.33 | 18.21  | 21.33 | -      | -     |
| T85 | 60.54 | 72.25 | 22.76  | -     | -      | -     |
| A92 | 55.83 | 20.50 | -      | -     | -      | -     |
| M96 | 59.85 | -     | 32.85  | -     | -      | 18.19 |

Table. S5. Assignment table of H25R/E118A at low [K+] and neutral pH

|     | CA    | CB    | CG/CG1 | CG2   | CD/CD1 | CE    |
|-----|-------|-------|--------|-------|--------|-------|
| A32 | 55.36 | 16.74 | -      | -     | -      | -     |
| T33 | 67.72 | 67.87 | 20.29  | -     | -      | -     |
| I38 | 66.31 | 37.61 | 29.67  | 17.34 | 14.07  | -     |
| Y45 | 61.47 | 39.10 | -      | -     | -      | -     |
| V48 | 65.35 | 31.04 | 23.05  | 21.62 | -      | -     |
| E51 | 57.58 | -     | 38.30  | -     | -      | -     |
| A54 | 50.04 | 18.22 | -      | -     | -      | -     |
| P55 | 62.77 | -     | 28.57  | -     | -      | -     |
| A57 | 53.11 | 21.41 | -      | -     | -      | -     |
| Q58 | 53.51 | 32.29 | 33.59  | -     | -      | -     |
| I60 | 61.29 | 38.46 | 25.89  | 18.13 | 13.73  | -     |
| T61 | 58.57 | 71.61 | 22.58  | -     | -      | -     |
| Y62 | 63.85 | 36.86 | -      | -     | -      | -     |
| T74 | 61.18 | 69.94 | 20.92  | -     | -      | -     |
| T75 | 62.89 | 69.54 | 21.27  | -     | -      | -     |
| V76 | 66.06 | 31.33 | 23.11  | 20.27 | -      | -     |
| Y78 | 61.51 | 38.75 | -      | -     | -      | -     |
| D80 | 55.13 | 37.15 | -      | -     | -      | -     |
| L81 | 53.22 | -     | 27.58  | -     | 20.95  | -     |
| Y82 | 55.32 | 35.27 | -      | -     | -      | -     |
| V84 | 60.46 | 32.33 | 18.21  | 21.33 | -      | -     |
| T85 | 60.54 | 72.25 | 22.76  | -     | -      | -     |
| A92 | 55.83 | 20.50 | -      | -     | -      | -     |
| M96 | 59.85 | -     | 32.85  | -     | -      | 18.19 |

Table. S6. Assignment table of wild type KcsA at high [K<sup>+</sup>] and low pH
